# Supplementary material
Source: PubMed Central journal article supplement (PMC7163917)
Supplement: NIHMS1562964-supplement-1.pdf [file NIHMS1562964-supplement-1.pdf]

1 **Inhibition of Striatal-enriched Protein Tyrosine Phosphatase by**  
2 **Targeting Computationally Revealed Cryptic Pockets**

3

4 Xuben Hou,<sup>†,§</sup> Jin-peng Sun,<sup>‡</sup> Lin Ge,<sup>‡</sup> Xiao Liang<sup>†</sup>, Kangshuai Li,<sup>‡</sup> Yingkai Zhang,<sup>§,⊥</sup> and Hao  
5 Fang<sup>†,\*</sup>

6 <sup>†</sup>Department of Medicinal Chemistry and Key Laboratory of Chemical Biology of Natural Products  
7 (MOE), School of Pharmaceutical Science, Shandong University, Jinan, Shandong, 250012, China

8 <sup>§</sup>Department of Chemistry, New York University, New York, New York 10003, United States

9 <sup>‡</sup>Key Laboratory Experimental Teratology of the Ministry of Education and Department of Biochemistry  
10 and Molecular Biology, School of Medicine, Shandong University, Jinan, Shandong 250012, China

11 <sup>⊥</sup>NYU-ECNU Center for Computational Chemistry, New York University–Shanghai, Shanghai  
12 200122, China

13

14

*Supporting Information*

15

16 Corresponding author:

17 \* (H.F.) Email: [haofangcn@sdu.edu.cn](mailto:haofangcn@sdu.edu.cn)

18

19

20

21

22

23

24

25

26

27

28

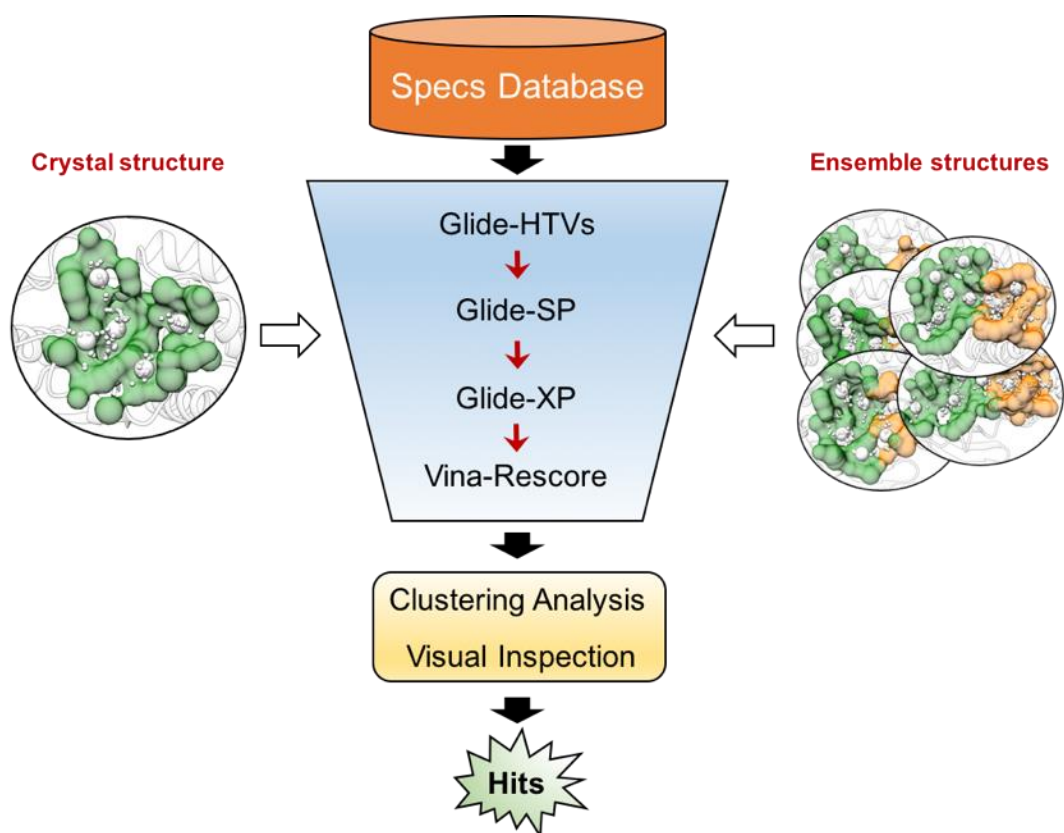

29

30 **Figure S1.** Structure-based virtual screening of STEP inhibitors using either crystal structure

31 (PDB: 2BV5) and ensemble structures from Markov State Model (MSM).

32

33

34

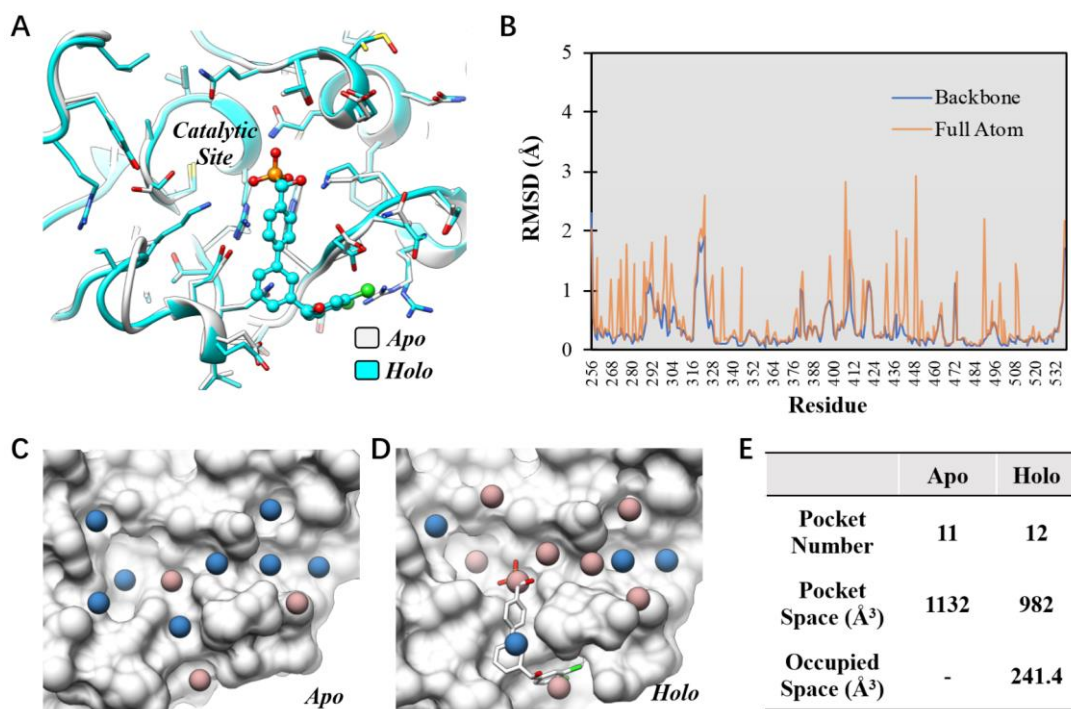

35

36 **Figure S2.** Comparison of apo (PDB: 2BV5) and holo (PDB: 5OVX) crystal structures of STEP.

37 (A) Structure alignment of apo and holo crystal structures. (B) Calculated per-residue RMSD values

38 for backbone and full atom. (C-E) Pocket analysis of apo and holo crystal structures. All detected

39 pockets are classified as auxiliary (blue sphere) and minor pockets (rosy brown sphere) by

40 employing AlphaSpace pocket score as described before (ref). Blue spheres represent pockets with

41 score >50 and rosy brown spheres represent pockets with score <50.

42

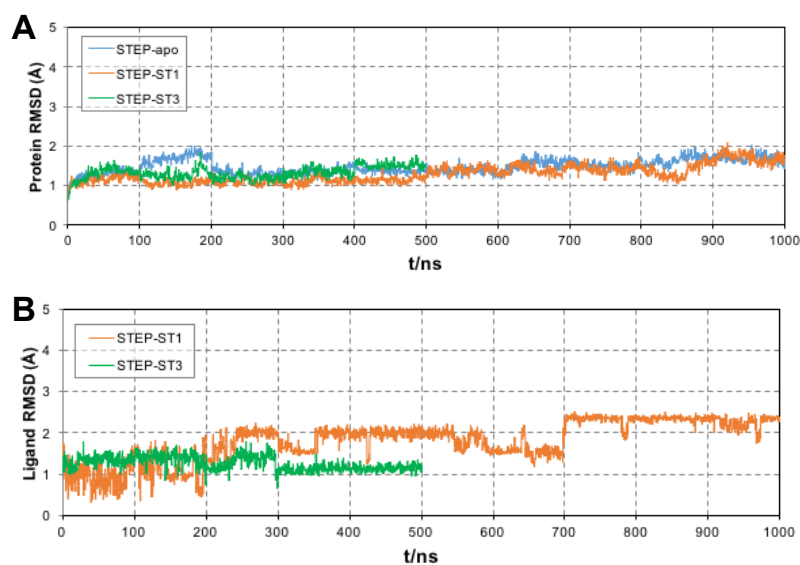

43

44 **Figure S3.** RMSD values for STEP proteins and inhibitors from MD simulations.

45

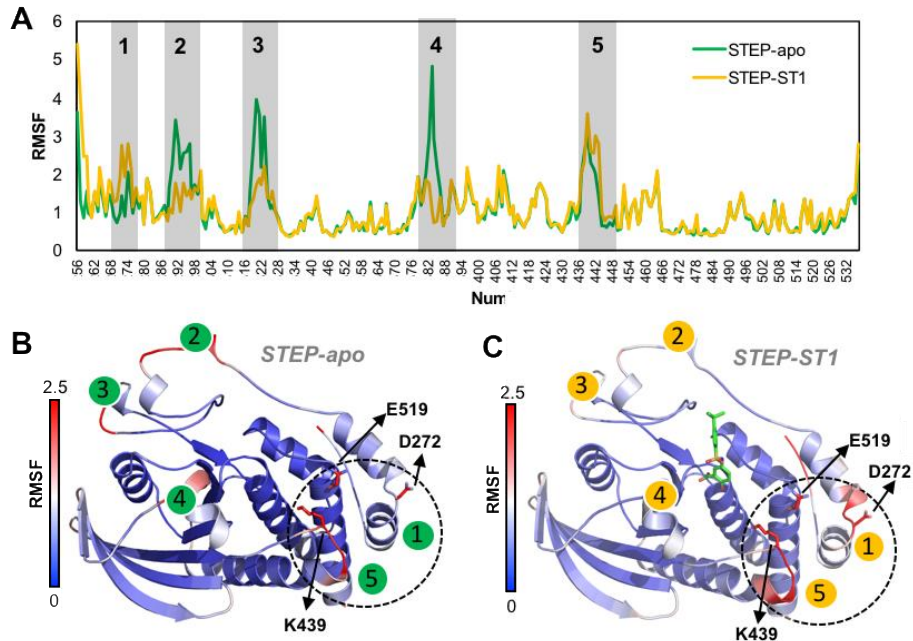

46  
 47 **Figure S4.** Comparison of the protein flexibility of STEP with and without inhibitor binding. (A)  
 48 Per-residue RMSF calculated from MD simulations of STEP-apo (green) and STEP-ST1 (yellow)  
 49 systems. Conformational dynamics of STEP-apo structure (B) and STEP-ST1 complex (C) colored  
 50 by their per-residue RMSF values. The crystal structure PDB:2BV5 serves as a template for  
 51 comparison. The binding pose of ST1 was derived from molecular docking using the crystal  
 52 structure. The color scale shows the calculated RMSF in Å.  
 53

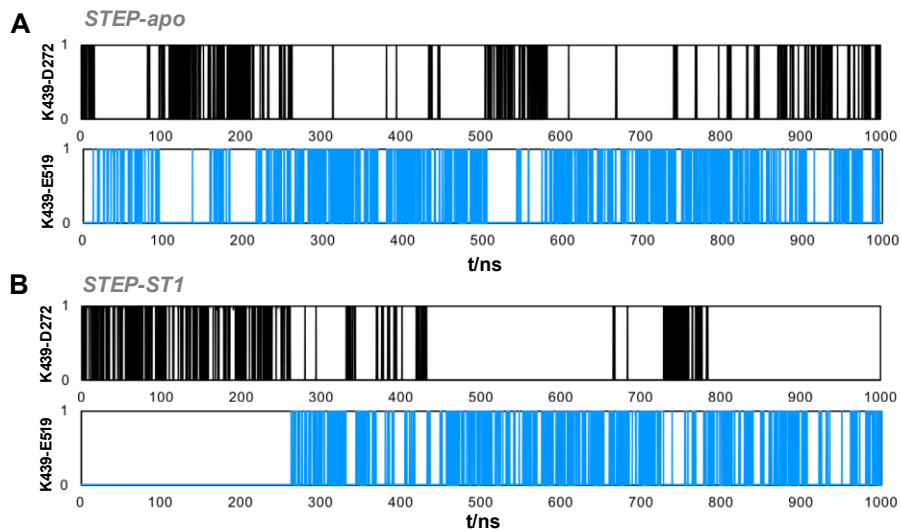

54  
 55 **Figure S5.** Formation of salt-bridge interactions between K439-D272 (black) and K439-E519 (blue)  
 56 during 1- $\mu$ s MD simulation on STEP-apo and STEP-ST1 systems.  
 57  
 58

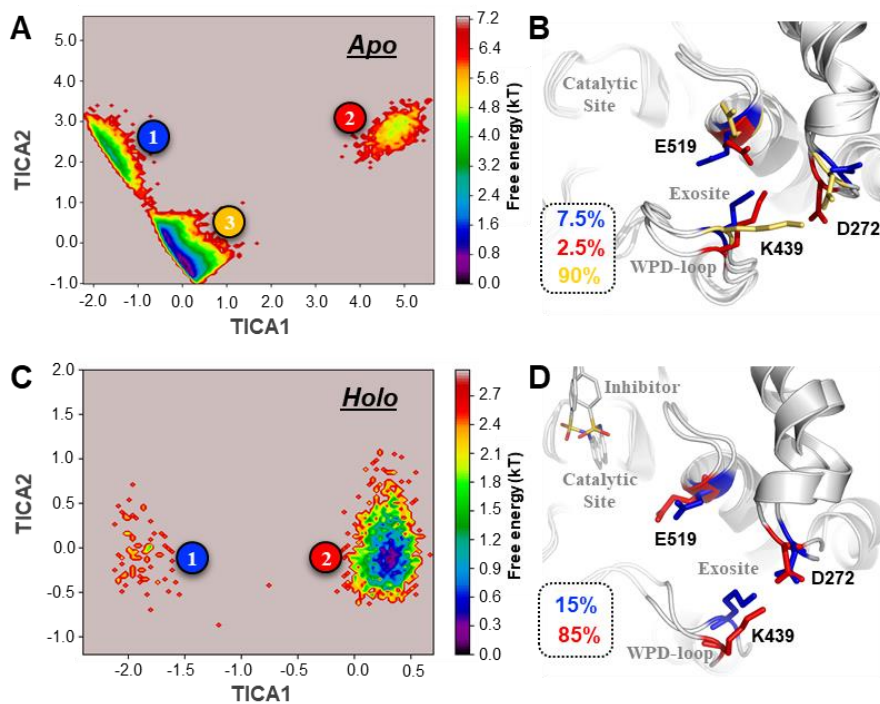

59

60 **Figure S6.** Free-energy landscapes of (A) the STEP-*apo* system and (C) the STEP-*ST1* system  
 61 obtained via MSM analysis along the first and second TICA coordinates. Representative MD  
 62 snapshots of macrostates from both (B) the STEP-*apo* system and (D) the STEP-*ST1* system. The  
 63 three residues (D272, K439 and E519) used for TICA construction are shown as stick models. The  
 64 location of each macrostate in the free-energy landscapes (left) is illustrated using the same color as  
 65 the residues in the representative MD snapshots (right).

66

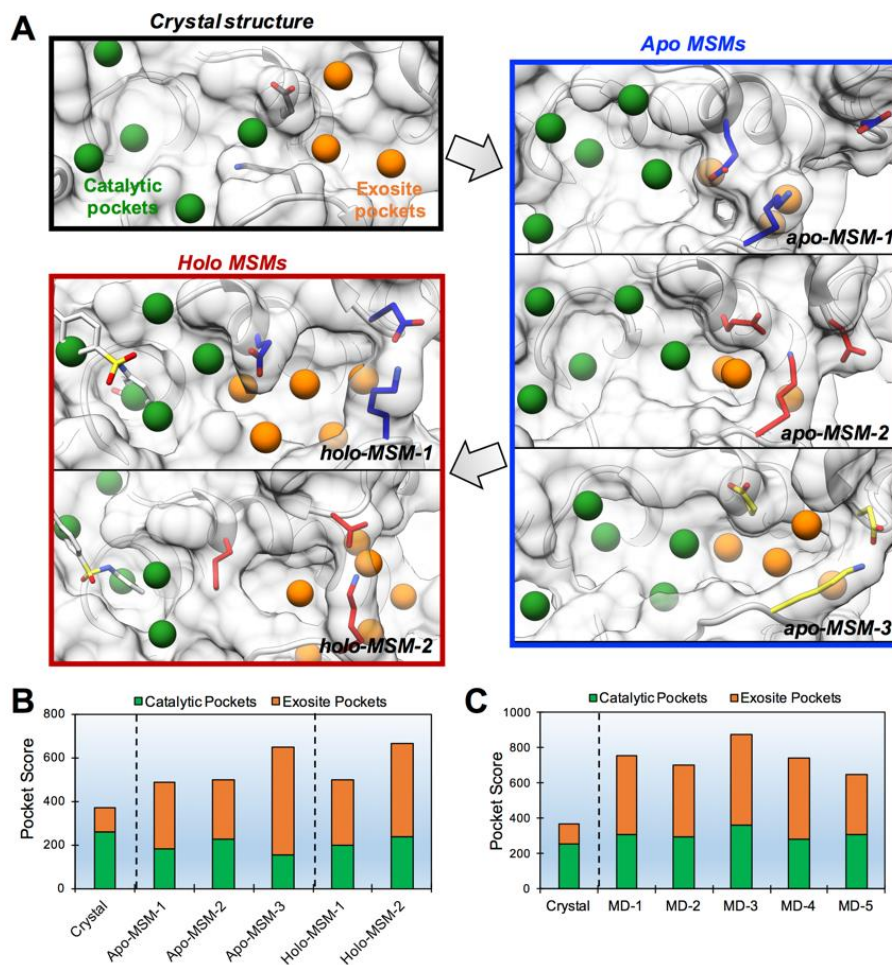

67

68 **Figure S7.** (A) Pocket analysis of apo crystal structure and representative MD snapshots from  
 69 selected MSMs of STEP-apo and STEP-holo systems. Catalytic pockets and exosite pockets are  
 70 presented using green and orange spheres. Key residues used for MSM construction and the  
 71 inhibitor ST1 are shown as stick models. (B) Comparison of pocket scores for catalytic pocket and  
 72 exosite pocket in crystal structures and selected MSMs. (C) Comparison of pocket scores of  
 73 catalytic pockets and exosite pockets from crystal structure and five selected MD snapshots from  
 74 MSMs.

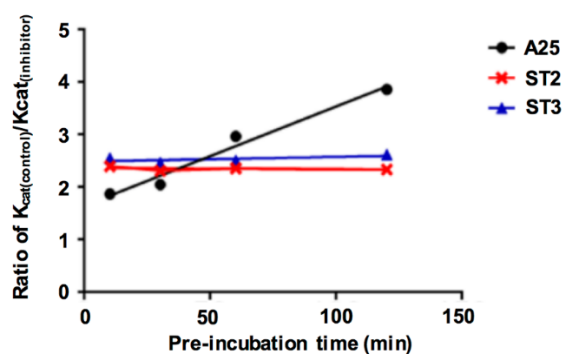

75

76 **Figure S8.** The time-dependent ratios of  $K_{cat}(\text{control})/K_{cat}(\text{inhibitor})$  for LYP inhibitor (A25) and  
 77 STEP inhibitors (ST2 and ST3).



78

79

**Table S1.** 32 Hit compounds from apo structure-based virtual screening.

| Specs ID        | Structure | Specs ID        | Structure |
|-----------------|-----------|-----------------|-----------|
| AQ-344/13518277 |           | AQ-390/42132976 |           |
| AK-777/36504012 |           | AR-422/41345504 |           |
| AK-968/15363155 |           | AK-918/15000007 |           |
| AC-907/34130062 |           | AS-871/43489763 |           |
| AE-907/30536043 |           | AB-323/25048464 |           |
| AE-641/30108041 |           | AH-262/34398043 |           |
| AN-465/43266004 |           | AE-641/00770041 |           |
| AR-422/43115151 |           | AF-399/40714286 |           |
| AI-204/43372118 |           | AN-329/43219660 |           |
| AK-918/41371592 |           | AG-690/15434541 |           |
| AO-476/41610193 |           | AS-871/43476422 |           |
| AS-871/43476127 |           | AG-205/13459129 |           |
| AE-641/00198040 |           | AE-641/06279003 |           |

|                 |  |                 |  |
|-----------------|--|-----------------|--|
| AE-406/41056893 |  | AI-204/31726003 |  |
| AL-281/15328110 |  | AI-204/31682033 |  |
| AK-918/37074019 |  | AP-906/41640126 |  |

(ST1)

80

81

82

**Table S2.** 32 Hit compounds from ensemble structure-based virtual screening.

| Specs ID        | Structure | Specs ID        | Structure |
|-----------------|-----------|-----------------|-----------|
| AP-853/43386858 |           | AO-022/43452506 |           |
|                 | (ST8)     |                 | (ST5)     |
| AK-968/40709324 |           | AP-853/43445418 |           |
| AE-848/14138703 |           | AF-399/15285005 |           |
|                 | (ST6)     |                 |           |
| AQ-149/13890403 |           | AN-989/41838787 |           |
| AO-022/40415417 |           | AG-205/13052034 |           |
|                 |           |                 | (ST2)     |
| AI-204/33265041 |           | AE-406/41057026 |           |
|                 |           |                 | (ST10)    |



|                 |                                                                                                     |                 |                                                                                                       |
|-----------------|-----------------------------------------------------------------------------------------------------|-----------------|-------------------------------------------------------------------------------------------------------|
| AG-205/34704054 | 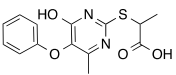                   | AP-906/41027680 | <br><b>(ST12)</b>  |
| AO-022/43452907 |                    | AQ-086/43457605 |                    |
| AN-465/43411092 |                    | AK-918/42815229 |                    |
| AK-968/15364107 |                    | AQ-390/42861800 | <br><b>(ST4)</b>   |
| AG-205/33667015 | <br><b>(ST3)</b>   | AP-893/40872493 |                    |
| AK-968/12515454 | <br><b>(ST11)</b> | AP-263/12245698 |                  |
| AP-263/12245694 |                  | AG-670/42920055 |                  |
| AF-399/37181008 |                  | AN-465/43421754 |                  |
| AQ-086/43383935 | <br><b>(ST7)</b> | AK-968/15363412 | <br><b>(ST9)</b> |
| AO-081/41131569 |                  | AP-185/43377268 |                  |

83

84

85 **Table S3.** Specs ID for **ST2** analogs and **ST3** analogs.

| Compound     | Specs ID        | Compound     | Specs ID        |
|--------------|-----------------|--------------|-----------------|
| <b>ST2-1</b> | AG-690/13153056 | <b>ST3-1</b> | AG-690/11835134 |
| <b>ST2-2</b> | AG-690/12869899 | <b>ST3-2</b> | AG-205/11234130 |
| <b>ST2-3</b> | AG-690/13153051 | <b>ST3-3</b> | AN-023/13438050 |
| <b>ST2-4</b> | AG-690/13153079 | <b>ST3-4</b> | AG-205/37007075 |
| <b>ST2-5</b> | AG-690/37099003 | <b>ST3-5</b> | AO-081/40681146 |

86

87

88

89 **Table S4.** Inhibitory activities of selected compounds against wide type STEP and F523A mutant.

| Protein      | Inhibitory activity ( $\mu\text{M}$ ) |               |                 |                |
|--------------|---------------------------------------|---------------|-----------------|----------------|
|              | ST2                                   | ST2-5         | ST3             | ST3-5          |
| <b>WT</b>    | 9.7 $\pm$ 2.6                         | 7.7 $\pm$ 1.5 | 10.7 $\pm$ 0.9  | 7.5 $\pm$ 1.2  |
| <b>F523A</b> | 31.3 $\pm$ 8.5                        | >100          | 99.7 $\pm$ 10.9 | 81.9 $\pm$ 9.2 |

90

91

92

93 **Video Captions**94 **Video S1.** MD simulation of STEP-apo system. STEP protein is shown as white surface with  
95 catalytic site and exosite site colored in green and orange yellow, respectively.

96

97 **Video S2.** MD simulation of STEP-**ST3** system. STEP protein is shown as white surface with  
98 catalytic site and exosite site colored in green and orange yellow, respectively. Inhibitor **ST3** are  
99 shown as spheres and colored according to atom type.

100

101

102 <sup>1</sup>H-NMR for representative compounds

103 Compound ST1

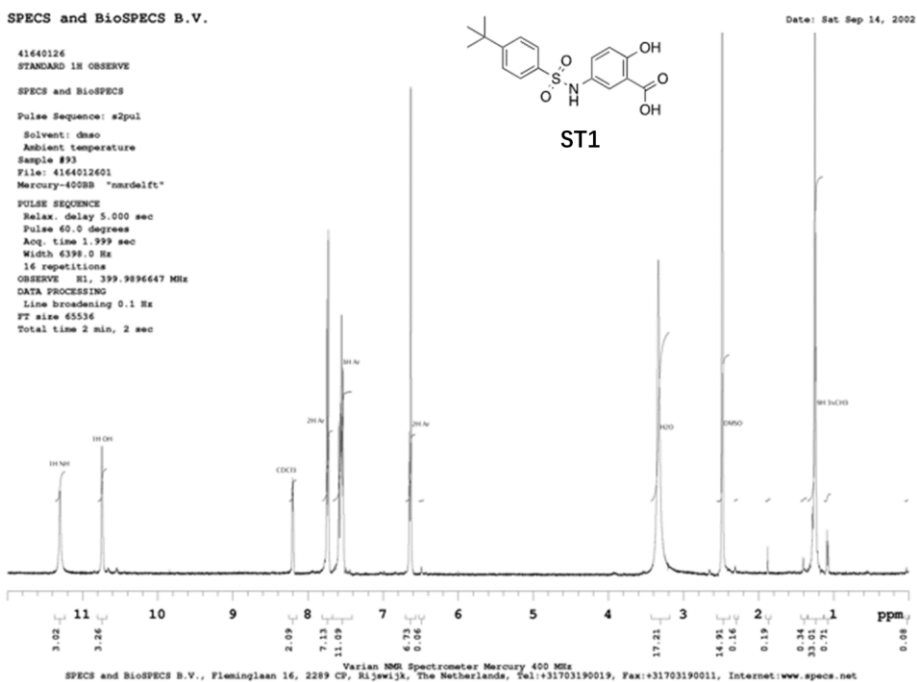

104

105

106 Compound ST2

© N.D. Zelinsky Institute of Organic Chemistry (Moscow), Bruker AM300 SF=300.13 MHz[H-1] SI=16K SR=6024 01=7180 PM=4 AQ=1.3599 RD=3 NS=16 SR=4787.839 TE: A6-205/13052034

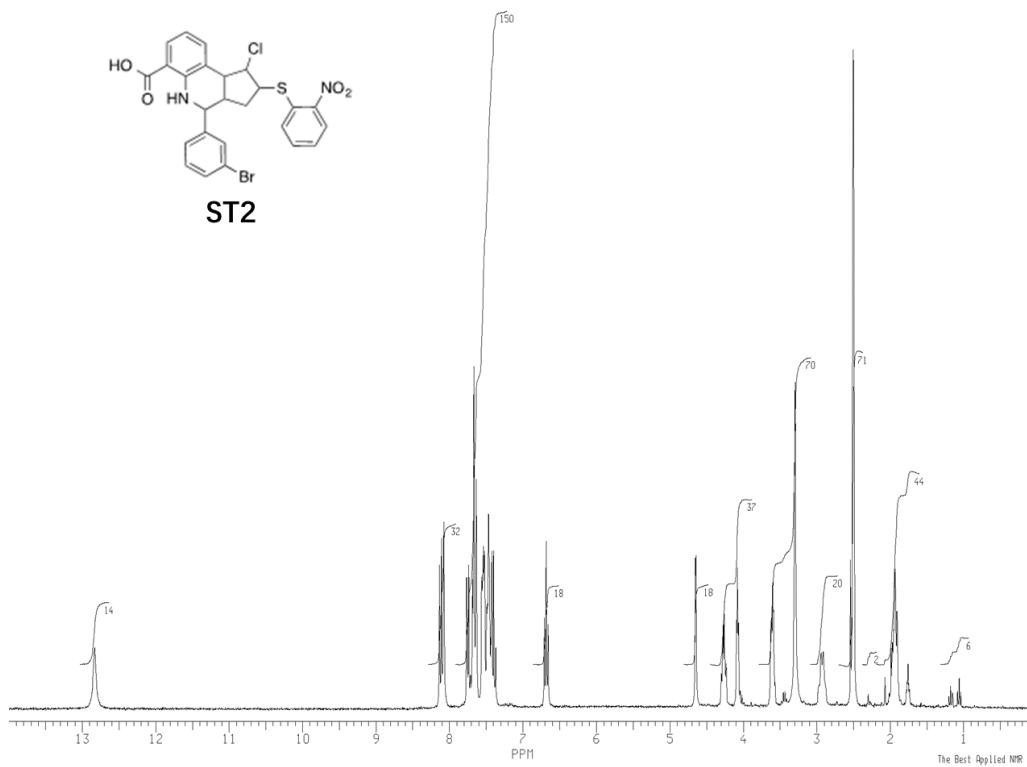

107

108

109

110 **Compound ST3**

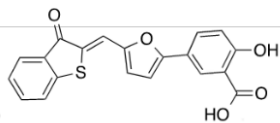

**ST3**

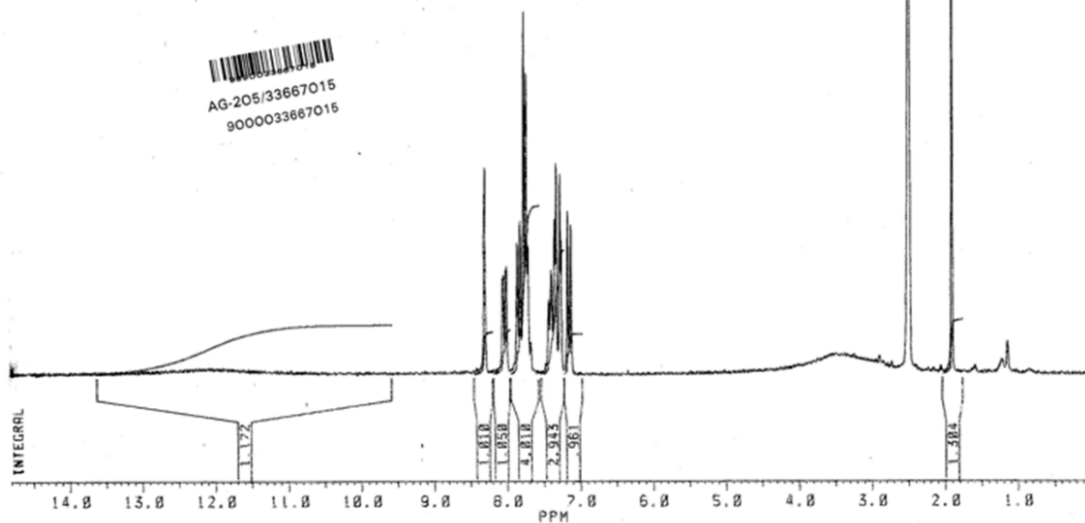

111

112

113 **Compound ST5**

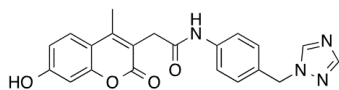

**ST5**

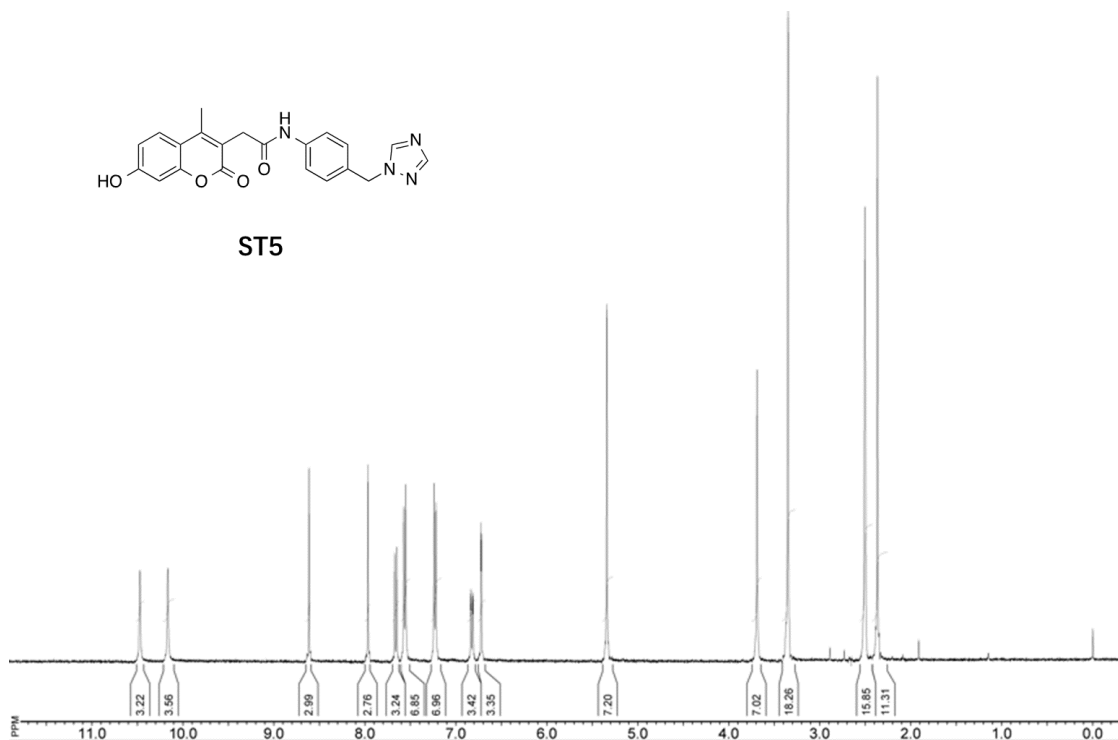

114

115

116

117 **Compound ST6**

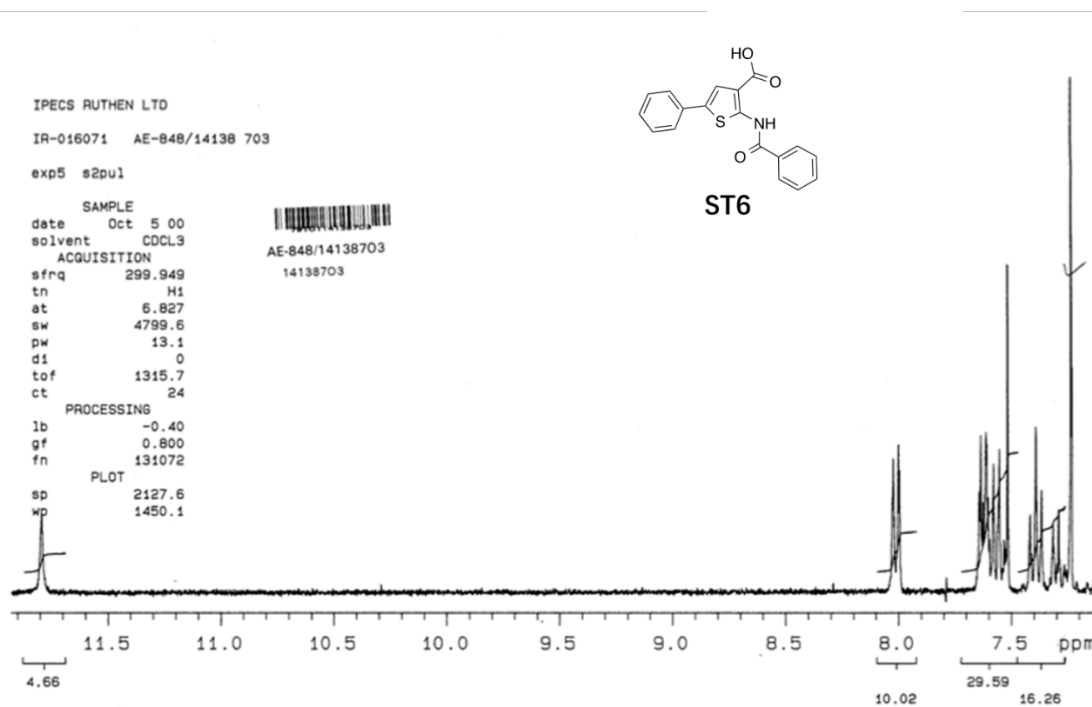

118

119 **Compound ST8**

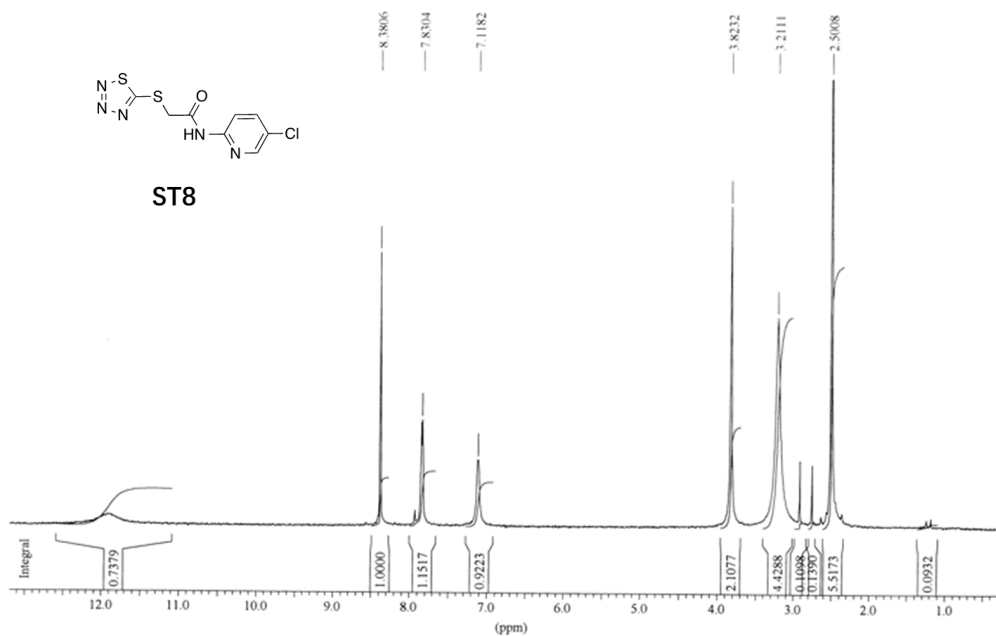

120

121

122

123

124



132

133 **Compound ST11**

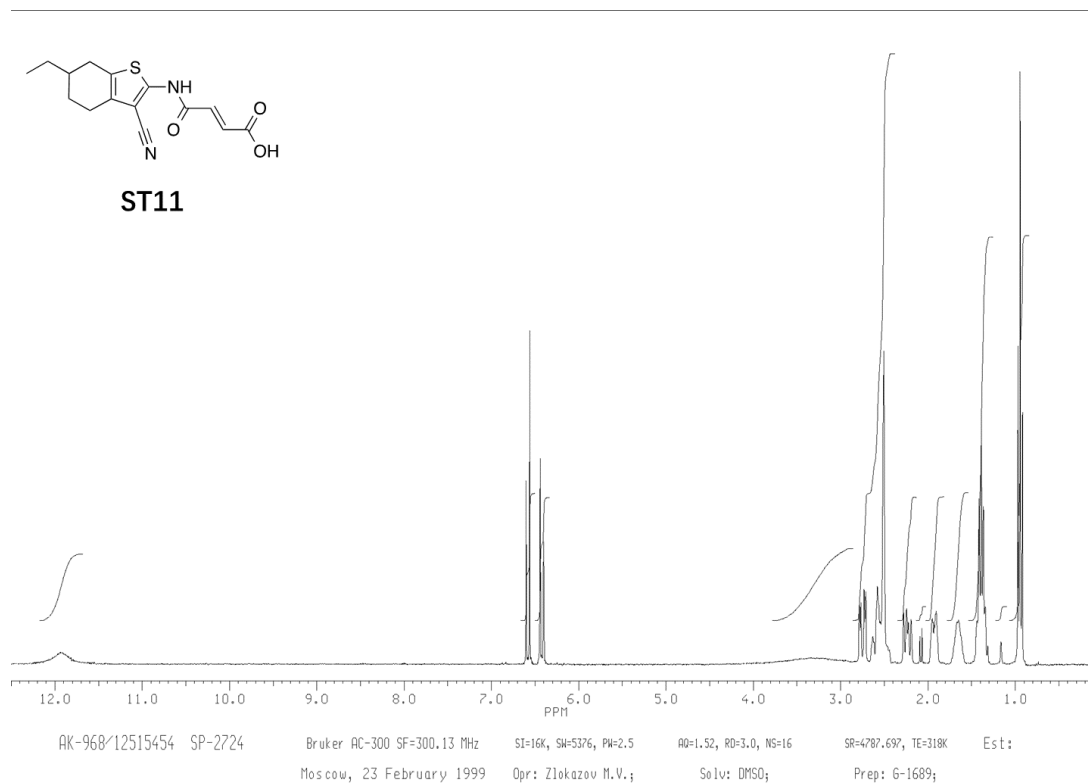

134
